# Supplementary material for: DNA aptamer-based dual-responsive nanoplatform for targeted MRI and combination therapy for cancer
Source: Royal Society of Chemistry journal article supplement (doi:10.1039/d1ra08373b), 2022-01-01
Supplement: d1ra08373b1.pdf [file d1ra08373b1.pdf]

## Supporting Information

DNA aptamer-based dual-responsive nanoplatform for targeted MRI and  
combination therapy for cancer

Mingming Zhao,<sup>a,b</sup> Xiaoxi Song,<sup>a,b</sup> Jiahui Lu,<sup>a</sup> Siwen Liu,<sup>a</sup> Xuan Sha,<sup>a</sup> Qi Wang,<sup>a,b</sup> Xu Cao,<sup>a</sup> Kai

Xu,<sup>a,b,\*</sup> Jingjing Li,<sup>a,b,\*</sup>

### Affiliations:

<sup>a</sup>School of Medical Imaging, Xuzhou Medical University, Xuzhou 221004, China

<sup>b</sup>Department of Radiology, Affiliated Hospital of Xuzhou Medical University, Xuzhou 221006,  
China

Corresponding author:

\* Jingjing Li, E-mail: qingchao0124@163.com

\*Kai Xu, E-mail: xkpaper@163.com

**Table S1:** Synthesized oligonucleotides used in the experiments.

| Oligonucleotides             | Sequence                                                                                         |
|------------------------------|--------------------------------------------------------------------------------------------------|
| Probe 1                      | 5'-GGTGGTGGTGGTTGTGGTGGTGGTGG<br>TTTTTACCTGGGGGAGTATTGCGCAGGAAGGT-3'                             |
| FAM-Probe 1                  | 5'-FAM-GGTGGTGGTGGTTGTGGTGGTGGTGG<br>TTTTTACCTGGGGGAGTATTGCGCAGGAAGGT-3'                         |
| FAM-NH <sub>2</sub> -Probe 1 | 5'-FAM-<br>GGTGGTGGTGGTTGTGGTGGTGGTGGTTTTTACCTGGGGGAGTATTGCGCAG<br>GAAGGT-C6-NH <sub>2</sub> -3' |
| cDNA                         | 5'-ACCTCCTCCGCAATACTCCCCAGGT-3'                                                                  |
| NH <sub>2</sub> -Probe 1     | 5'-GGTGGTGGTGGTTGTGGTGGTGGTGG<br>TTTTTACCTGGGGGAGTATTGCGCAGGAAGGT- C6-NH <sub>2</sub> -3'        |
| Probe 2                      | 5'-ACCTGGGGGAGTATTGCGCAGGAAGGT-3'                                                                |

Notes: AS1411 aptamer was marked with red color and ATP aptamer as marked with green color.

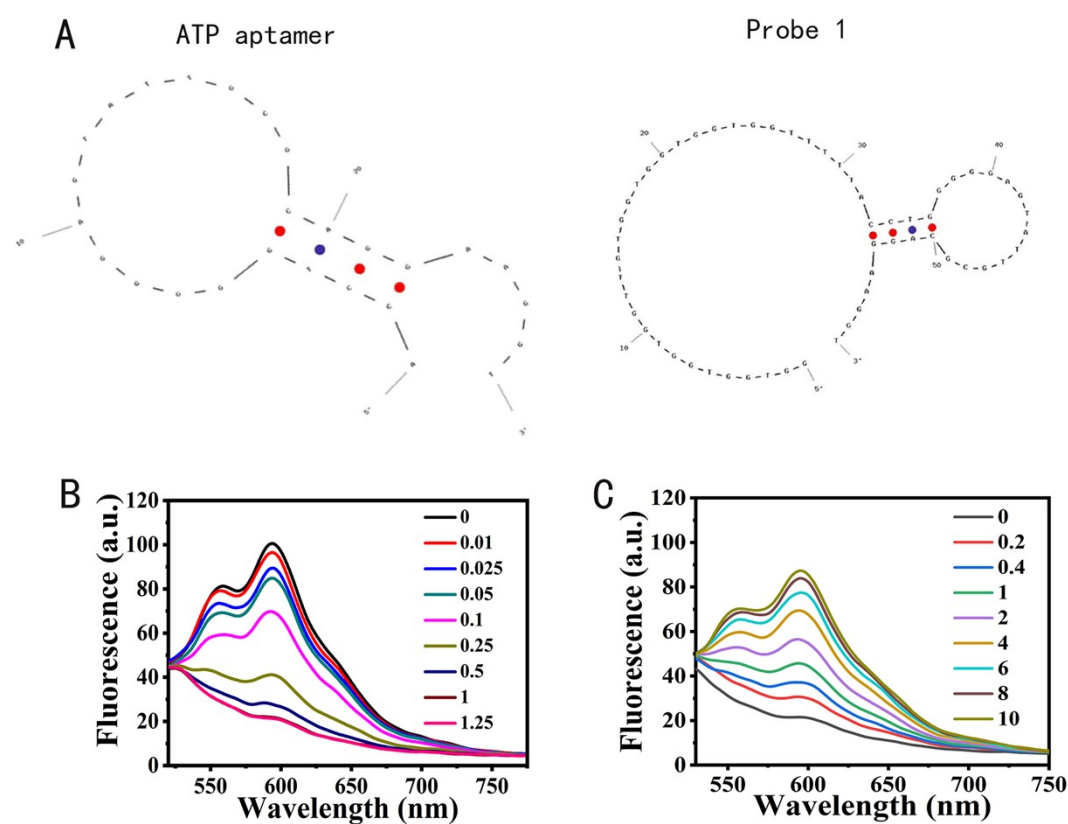

**Fig S1:** (A) Second structure of ATP aptamer and Probe 1 produced by IDT software. (B) The loading of Dox by NH<sub>2</sub>-Probe 2-cDNA. (C) The release of Dox from ATP-triggered NH<sub>2</sub>-Probe 2-cDNA-Dox.

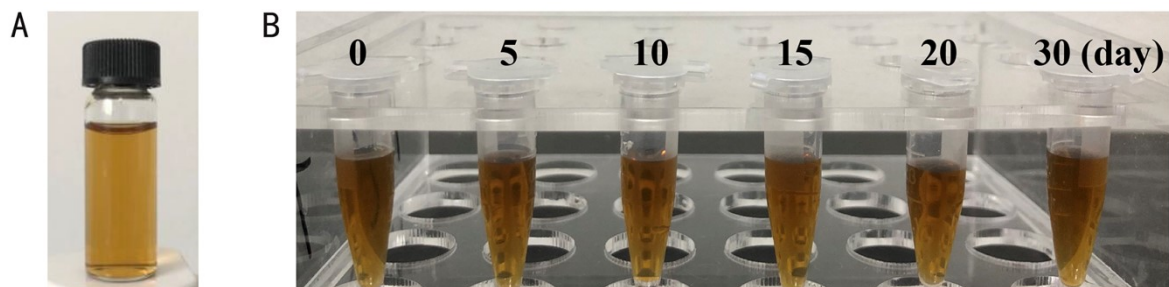

**Fig S2:** (A) Photographs of MnO<sub>2</sub> nanosheets solution. (B) Photographs of MnO<sub>2</sub> nanosheets solution during a 30-day period at 4 °C.

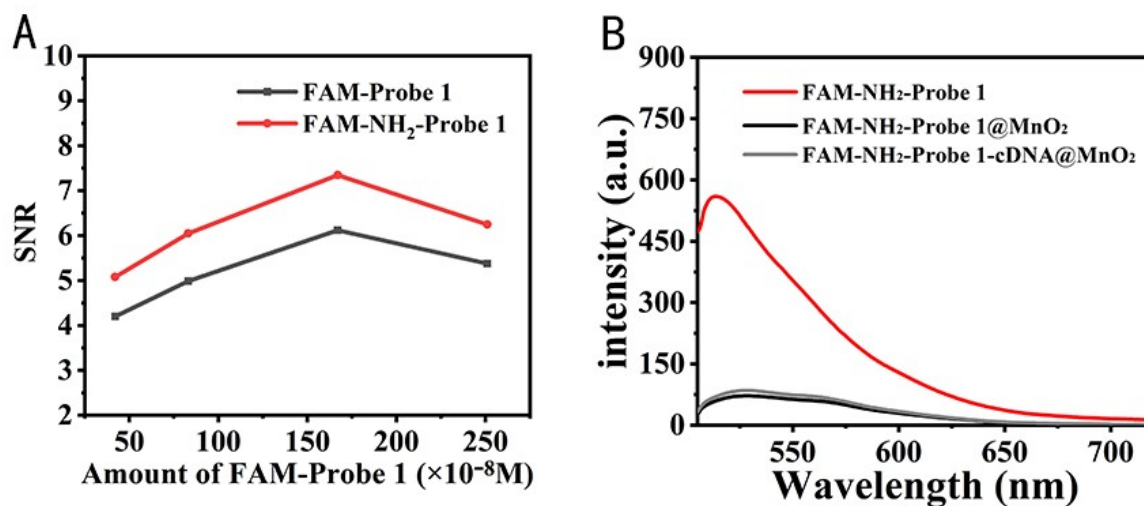

**Fig S3:** (A) Adsorption of FAM-Probe 1 and FAM-NH<sub>2</sub>-Probe 1 on MnO<sub>2</sub> nanosheets. (B) Adsorption of FAM-NH<sub>2</sub>-Probe 1-cDNA on MnO<sub>2</sub> nanosheets.

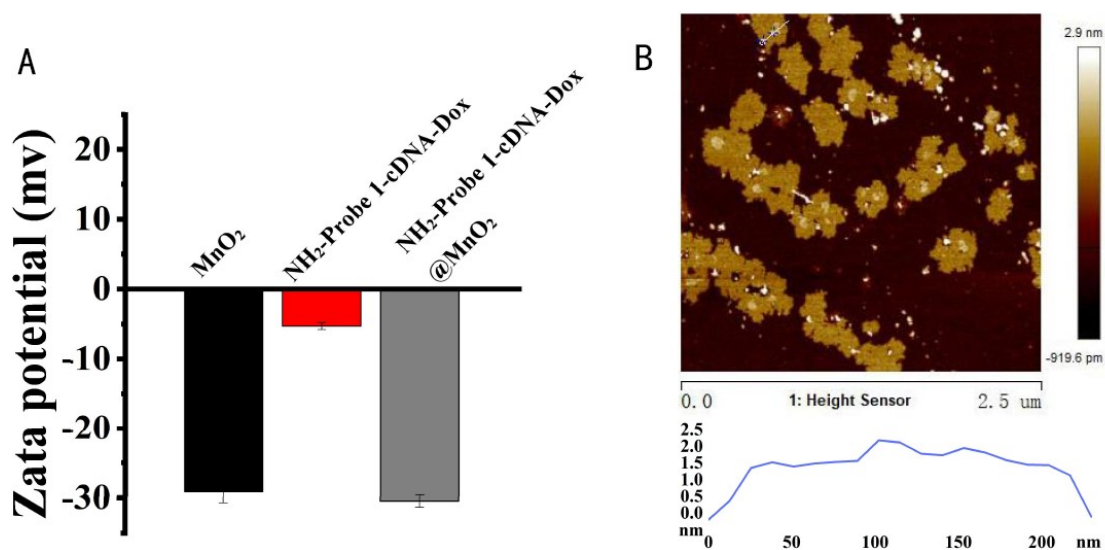

**Fig S4:** (A) Zeta potential determinations of  $\text{MnO}_2$ ,  $\text{NH}_2$ -Probe 1-cDNA-Dox and  $\text{NH}_2$ -Probe 1-cDNA-Dox@ $\text{MnO}_2$ . (B) The AFM characterization of  $\text{NH}_2$ -Probe 1 - cDNA-Dox@ $\text{MnO}_2$ .

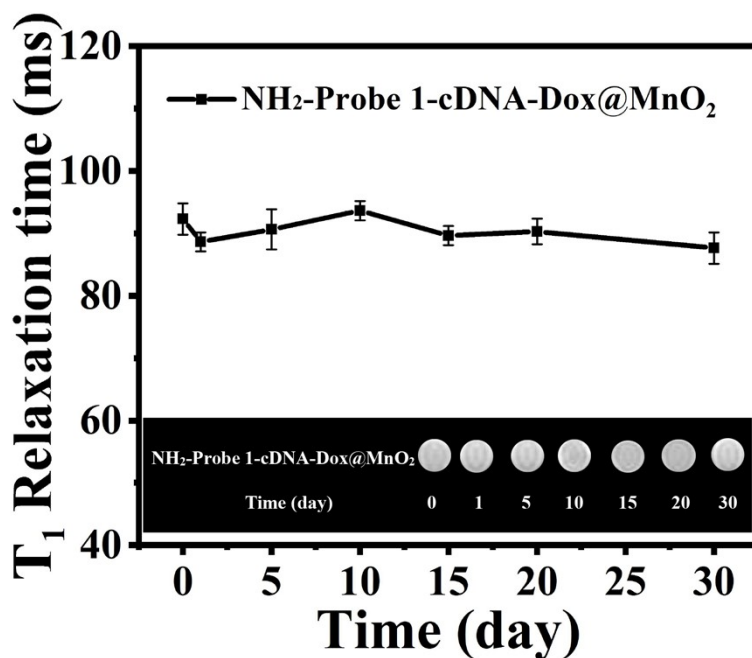

**Fig S5:** MRI signal intensity change of  $\text{NH}_2$ -Probe 1-cDNA-Dox@ $\text{MnO}_2$  with GSH during a 30-day period. Inset picture is the corresponding  $T_1$ -weighted MRI image.

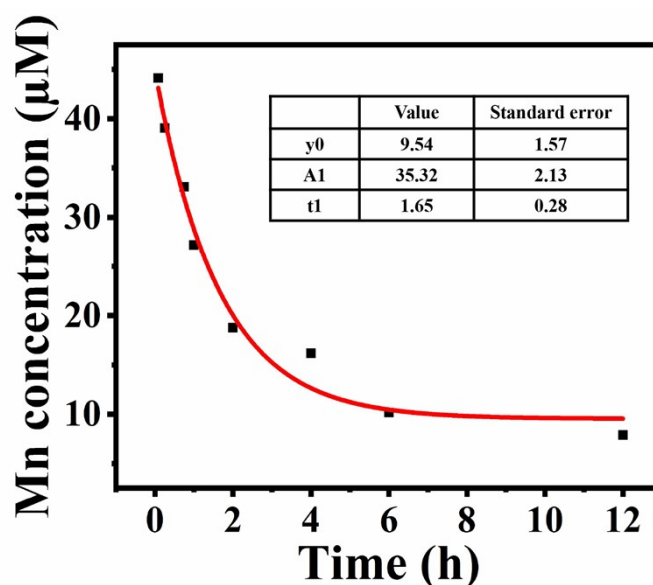

**Fig S6:** Fitting half-life curve of  $\text{NH}_2$ -Probe 1-cDNA-Dox@ $\text{MnO}_2$ .
